# Supplementary material for: Global seafood consumption footprint
Source: PubMed Central journal article supplement (PMC6346599; doi:10.1007/s13280-018-1060-9), 2018-05-29
Supplement: 13280_2018_1060_MOESM1_ESM.pdf [file 13280_2018_1060_MOESM1_ESM.pdf]

*Ambio*

Electronic Supplementary Material

*This supplementary material has not been peer reviewed.*

Title: **Global seafood consumption footprint**

Authors: Jordi Guillen, Fabrizio Natale, Natacha Carvalho, John Casey, Johann Hofherr, Jean-Noël Druon, Gianluca Fiore, Maurizio Gibin, Antonella Zanzi, Jann Th. Martinsohn.

## **A1: Calibration of the model**

The calibrated model closely reproduces the 2011 global levels of seafood production. The differences between the model estimates and the production reported in official statistics was -2.8 million tonnes (-1.8%) for the capture fisheries and aquaculture sectors and + 62.7 thousand tonnes for the fishmeal sector (+1.1%). The estimated proportion of the total seafood production derived from aquaculture was 39.3% compared to 39.4% in the statistical data, indicating that the model was able to correctly attribute and replicate the origin and volume of the supply and trade in seafood products to the aquaculture and capture fisheries sectors.

Adjustments to the trading coefficient during calibration were mainly concerned with correcting the data for China and for other countries with large volumes of trade in transit (i.e., re-exporting of fresh and processed seafood). The need for corrections in countries of transit can be explained by the fact that the model does not capture the full trade path from true origins and destinations, resulting in an underestimation of the  $c_{ss}$  coefficients.

Despite the calibration, differences between model estimates of production and published statistical data remain in some cases (Figure S1). Such differences largely arise through errors in model estimates of production for the national capture fisheries and fishmeal sectors within specific countries, rather than to incorrect allocation of production to the aquaculture and capture fisheries sectors. Such differences are partly balanced when aggregating at the global scale.

In particular, for capture fisheries and aquaculture combined, the calibrated model estimates were lower than the production reported in the official statistics; the largest differences relate to Chile (-1.3 million tonnes), Myanmar (-1.2 million tonnes) and Taiwan (-1.2 million tonnes). In the case of fishmeal, the estimated production was lower than the official statistics for Japan (-130 thousand tonnes), Thailand (-105 thousand tonnes), Chile (-72 thousand tonnes) and Denmark (-55 thousand tonnes). These discrepancies may be attributed to the data omissions from official statistics (e.g. no data on demand and trade for Taiwan), issues related to the technical coefficients used as parameters in the model which are not able to capture country specificities or to inconsistencies between demand, trade and primary production across the different statistical data sources.

Figure S1: Calibration results for capture fisheries and aquaculture (in million tonnes) and fishmeal (thousand tonnes) for the countries showing the largest deviations based on 2011. The larger area shows the official statistic and the internal column the estimated value.

Calibration results: fisheries and aquaculture

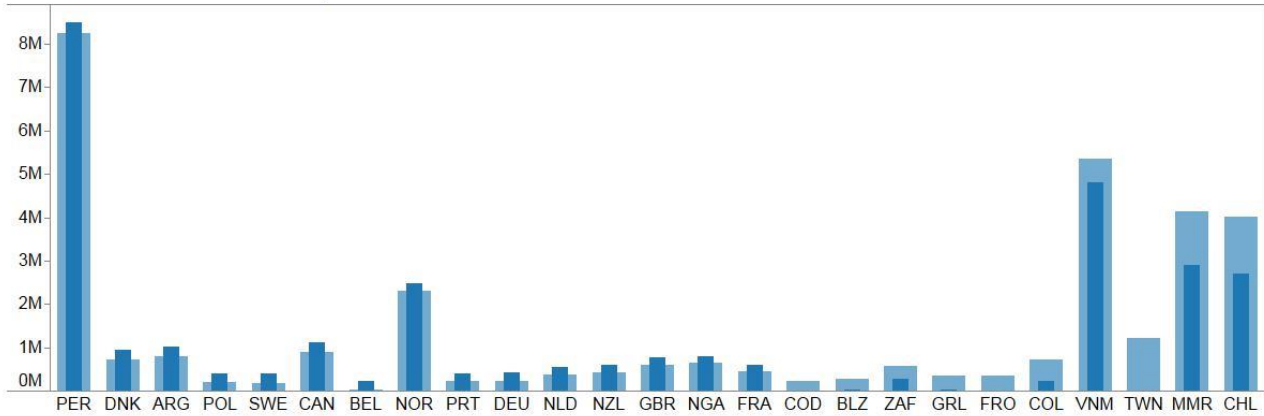

Calibration results: fish meal

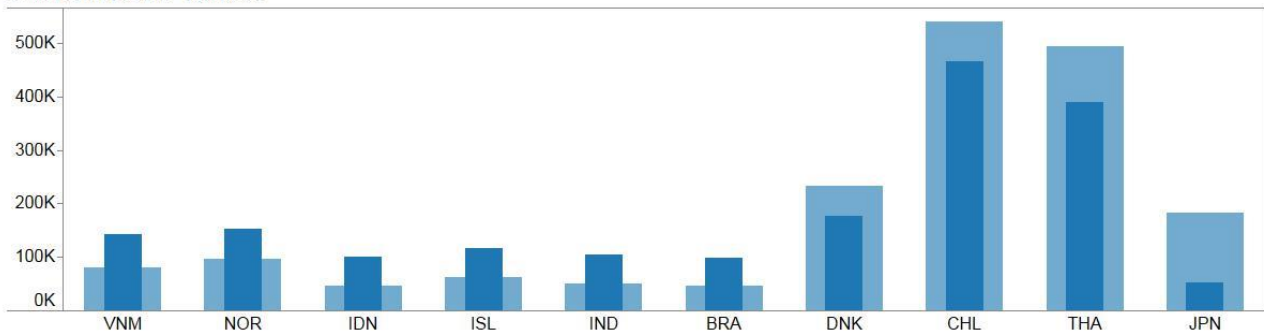

Table S1: Seafood consumption footprint (tonnes) and per capita consumption footprint (kg) for the aquaculture, capture fisheries and fishmeal sectors for the top 100 countries ranked according to their consumption for 2011.

| Country                   | Country code | Total consumption footprint (tonnes) | Consumption footprint per capita (kg) |           |             |           |
|---------------------------|--------------|--------------------------------------|---------------------------------------|-----------|-------------|-----------|
|                           |              |                                      | Total                                 | Fisheries | Aquaculture | Fish meal |
| World                     |              | 154 187 007                          | 22.3                                  | 9.7       | 8.8         | 3.8       |
| China                     | CHN          | 64 951 697                           | 48.3                                  | 12.9      | 27.1        | 8.3       |
| European Union            | EU           | 13 051 508                           | 25.7                                  | 14.4      | 5.7         | 5.6       |
| Japan                     | JPN          | 7 412 488                            | 58.0                                  | 35.3      | 14.6        | 8.1       |
| Indonesia                 | IDN          | 7 297 806                            | 30.1                                  | 15.5      | 9.6         | 5.1       |
| United States             | USA          | 7 143 636                            | 22.9                                  | 13.1      | 5.3         | 4.5       |
| India                     | IND          | 6 331 374                            | 5.1                                   | 2.3       | 2.3         | 0.4       |
| Korea, Republic of        | KOR          | 3 907 340                            | 78.5                                  | 48.9      | 21.7        | 7.8       |
| Russian Federation        | RUS          | 3 405 490                            | 24.0                                  | 16.6      | 3.8         | 3.5       |
| Viet Nam                  | VNM          | 3 257 070                            | 37.1                                  | 11.6      | 16.5        | 9.0       |
| Philippines               | PHL          | 3 247 409                            | 34.2                                  | 22.5      | 8.5         | 3.3       |
| Bangladesh                | BGD          | 3 007 999                            | 20.0                                  | 8.4       | 9.7         | 1.8       |
| Nigeria                   | NGA          | 2 971 053                            | 18.3                                  | 12.0      | 4.4         | 1.8       |
| Myanmar                   | MMR          | 2 897 091                            | 59.9                                  | 44.7      | 11.8        | 3.4       |
| France                    | FRA          | 2 391 316                            | 36.5                                  | 22.4      | 8.1         | 6.0       |
| Brazil                    | BRA          | 2 179 102                            | 11.1                                  | 2.4       | 4.4         | 4.3       |
| Spain                     | ESP          | 2 138 501                            | 46.3                                  | 28.3      | 9.1         | 8.8       |
| Egypt                     | EGY          | 1 878 771                            | 22.8                                  | 3.7       | 13.2        | 5.8       |
| Thailand                  | THA          | 1 785 733                            | 25.7                                  | 9.8       | 8.6         | 7.4       |
| Italy                     | ITA          | 1 715 292                            | 28.2                                  | 15.7      | 7.0         | 5.5       |
| Malaysia                  | MYS          | 1 691 515                            | 58.6                                  | 35.6      | 14.4        | 8.6       |
| Germany                   | DEU          | 1 375 334                            | 16.8                                  | 9.1       | 3.9         | 3.9       |
| United Kingdom            | GBR          | 1 325 170                            | 21.2                                  | 11.4      | 5.0         | 4.7       |
| Mexico                    | MEX          | 1 320 667                            | 11.5                                  | 6.9       | 1.7         | 2.9       |
| Peru                      | PER          | 850 602                              | 28.9                                  | 21.9      | 0.3         | 6.7       |
| Canada                    | CAN          | 836 166                              | 24.2                                  | 12.8      | 5.4         | 6.0       |
| Ghana                     | GHA          | 680 875                              | 27.3                                  | 23.5      | 2.6         | 1.2       |
| Ukraine                   | UKR          | 675 578                              | 14.8                                  | 9.0       | 2.6         | 3.2       |
| Portugal                  | PRT          | 654 682                              | 61.5                                  | 40.0      | 11.7        | 9.8       |
| Turkey                    | TUR          | 651 694                              | 8.8                                   | 3.6       | 2.0         | 3.3       |
| Iran, Islamic Republic of | IRN          | 624 954                              | 8.4                                   | 2.1       | 2.8         | 3.5       |
| Australia                 | AUS          | 622 112                              | 27.5                                  | 12.6      | 8.7         | 6.3       |
| Poland                    | POL          | 564 598                              | 14.8                                  | 7.4       | 3.0         | 4.4       |
| Sri Lanka                 | LKA          | 553 529                              | 26.5                                  | 20.6      | 3.6         | 2.3       |
| Cambodia                  | KHM          | 518 864                              | 36.3                                  | 29.5      | 4.4         | 2.3       |
| Netherlands               | NLD          | 461 804                              | 27.7                                  | 14.6      | 5.0         | 8.1       |
| Uganda                    | UGA          | 460 743                              | 13.4                                  | 10.2      | 2.2         | 1.0       |

|                                        |     |         |      |      |      |      |
|----------------------------------------|-----|---------|------|------|------|------|
| Morocco                                | MAR | 447 683 | 13.9 | 12.5 | 0.3  | 1.1  |
| Venezuela                              | VEN | 414 051 | 14.1 | 8.9  | 1.7  | 3.6  |
| Cameroon                               | CMR | 386 995 | 19.3 | 15.9 | 2.0  | 1.5  |
| Côte d'Ivoire                          | CIV | 357 937 | 17.8 | 14.8 | 2.0  | 0.9  |
| Pakistan                               | PAK | 350 696 | 2.0  | 1.2  | 0.5  | 0.3  |
| Angola                                 | AGO | 334 368 | 17.0 | 14.3 | 1.1  | 1.6  |
| Sweden                                 | SWE | 332 778 | 35.2 | 19.4 | 8.3  | 7.5  |
| Norway                                 | NOR | 329 787 | 66.6 | 26.2 | 16.2 | 24.2 |
| Senegal                                | SEN | 329 715 | 25.8 | 25.0 | 0.1  | 0.7  |
| Belgium                                | BEL | 310 421 | 28.2 | 14.5 | 7.1  | 6.6  |
| South Africa                           | ZAF | 310 029 | 6.1  | 3.5  | 1.1  | 1.5  |
| Chile                                  | CHL | 309 374 | 17.9 | 7.1  | 3.4  | 7.4  |
| Colombia                               | COL | 301 637 | 6.4  | 3.8  | 0.9  | 1.7  |
| Greece                                 | GRC | 290 579 | 25.7 | 6.4  | 8.9  | 10.5 |
| United Republic of Tanzania            | TZA | 276 750 | 6.0  | 5.5  | 0.3  | 0.2  |
| Saudi Arabia                           | SAU | 251 624 | 9.0  | 3.9  | 2.3  | 2.8  |
| Argentina                              | ARG | 243 094 | 6.0  | 3.7  | 0.7  | 1.5  |
| Korea, Democratic People's Republic of | PRK | 235 150 | 9.6  | 6.3  | 2.6  | 0.7  |
| United Arab Emirates                   | ARE | 220 189 | 27.9 | 19.3 | 5.6  | 3.0  |
| Finland                                | FIN | 212 891 | 39.5 | 27.2 | 5.1  | 7.3  |
| Mozambique                             | MOZ | 209 178 | 8.7  | 8.1  | 0.1  | 0.5  |
| Denmark                                | DNK | 198 235 | 35.6 | 11.1 | 3.7  | 20.7 |
| Sierra Leone                           | SLE | 196 459 | 32.8 | 32.4 | 0.1  | 0.3  |
| Kenya                                  | KEN | 189 982 | 4.6  | 3.8  | 0.5  | 0.3  |
| Belarus                                | BLR | 186 885 | 19.7 | 9.6  | 4.5  | 5.6  |
| Israel                                 | ISR | 174 076 | 22.4 | 6.4  | 10.1 | 5.9  |
| Romania                                | ROU | 165 764 | 7.7  | 2.5  | 2.2  | 3.0  |
| Switzerland                            | CHE | 151 384 | 19.1 | 10.1 | 4.8  | 4.3  |
| Algeria                                | DZA | 151 173 | 4.2  | 2.8  | 0.6  | 0.8  |
| Ecuador                                | ECU | 146 490 | 10.0 | 2.3  | 2.4  | 5.4  |
| Tunisia                                | TUN | 146 064 | 13.7 | 8.2  | 2.5  | 3.0  |
| Lithuania                              | LTU | 143 951 | 44.9 | 31.5 | 6.1  | 7.3  |
| Benin                                  | BEN | 133 701 | 14.7 | 12.8 | 1.0  | 0.8  |
| Austria                                | AUT | 125 884 | 15.0 | 8.4  | 2.8  | 3.8  |
| Mali                                   | MLI | 119 235 | 7.5  | 7.0  | 0.1  | 0.4  |
| New Zealand                            | NZL | 118 051 | 26.8 | 17.2 | 6.5  | 3.2  |
| Czech Republic                         | CZE | 115 121 | 10.9 | 5.5  | 2.9  | 2.5  |
| Congo                                  | COG | 114 828 | 27.7 | 21.6 | 3.2  | 3.0  |
| Ireland                                | IRL | 110 559 | 24.6 | 13.9 | 4.6  | 6.2  |
| Lao People's Democratic Republic       | LAO | 108 550 | 17.3 | 0.8  | 12.5 | 3.9  |
| Guinea                                 | GIN | 108 144 | 10.6 | 10.2 | 0.1  | 0.3  |
| Burkina Faso                           | BFA | 107 859 | 6.4  | 5.0  | 0.3  | 1.1  |
| Dominican Republic                     | DOM | 107 248 | 10.7 | 3.2  | 2.7  | 4.8  |
| Madagascar                             | MDG | 105 749 | 5.0  | 3.6  | 0.5  | 0.9  |
| Iraq                                   | IRQ | 99 352  | 3.0  | 1.5  | 1.0  | 0.5  |

|                      |     |        |      |      |     |     |
|----------------------|-----|--------|------|------|-----|-----|
| Croatia              | HRV | 94 050 | 21.3 | 13.0 | 4.0 | 4.3 |
| Zambia               | ZMB | 91 339 | 6.8  | 5.3  | 0.6 | 0.8 |
| Kazakhstan           | KAZ | 87 040 | 5.3  | 3.0  | 0.8 | 1.4 |
| Oman                 | OMN | 81 896 | 28.8 | 26.2 | 1.6 | 0.9 |
| Malawi               | MWI | 78 281 | 5.1  | 4.0  | 0.2 | 0.9 |
| Jamaica              | JAM | 72 772 | 26.9 | 14.6 | 5.5 | 6.8 |
| Serbia               | SRB | 68 514 | 9.4  | 3.0  | 2.5 | 4.0 |
| Cuba                 | CUB | 66 671 | 5.9  | 1.4  | 2.6 | 1.9 |
| Latvia               | LVA | 62 325 | 28.1 | 21.4 | 2.7 | 4.0 |
| Hungary              | HUN | 61 500 | 6.2  | 1.2  | 2.2 | 2.8 |
| Chad                 | TCD | 60 745 | 5.3  | 5.2  | 0.0 | 0.1 |
| Nepal                | NPL | 60 359 | 2.0  | 0.4  | 1.1 | 0.4 |
| Yemen                | YEM | 60 266 | 2.4  | 1.2  | 0.5 | 0.7 |
| Bulgaria             | BGR | 57 763 | 7.7  | 3.0  | 2.4 | 2.3 |
| Lebanon              | LBN | 55 937 | 13.1 | 4.8  | 3.7 | 4.6 |
| Moldova, Republic of | MDA | 55 735 | 15.7 | 6.5  | 5.8 | 3.4 |
| Gabon                | GAB | 55 243 | 36.0 | 29.5 | 3.7 | 2.8 |
| Costa Rica           | CRI | 54 492 | 11.5 | 3.7  | 4.4 | 3.5 |
